# Supplementary material
Source: PubMed Central journal article supplement (PMC3816483)
Supplement: 1317164110_pnas.201317164SI.pdf [file 1317164110_pnas.201317164SI.pdf]

# Supporting Information

Berry et al. 10.1073/pnas.1317164110

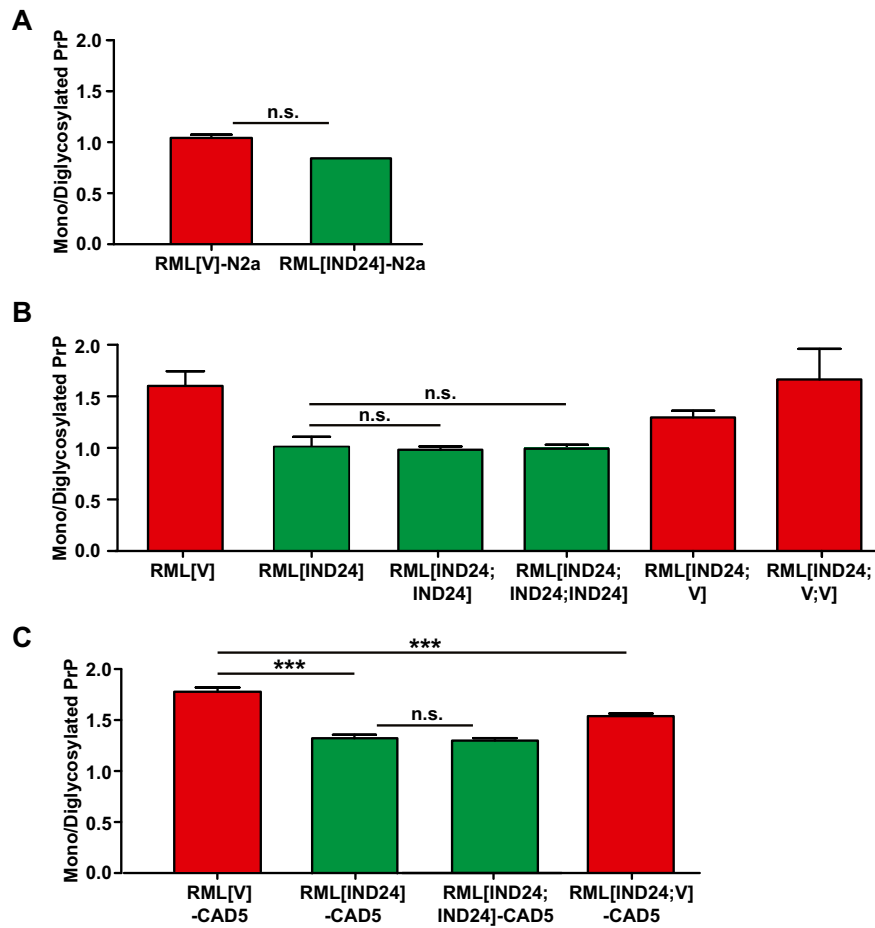

**Fig. S1.** Glycosylation ratios of prions from IND24-treated and vehicle-treated mice. Nomenclature as defined in the main text. (A) Average ratio of monoglycosylated to diglycosylated disease-causing prion protein (PrP<sup>Sc</sup>) in N2a cells infected with RML[V] (red,  $n = 2$ ) or RML[IND24] (green,  $n = 1$ ). Error bar represents range. (B) Average ratio of monoglycosylated to diglycosylated PrP<sup>Sc</sup> in RML[IND24]-infected mice treated with IND24 ( $n = 7$ ); RML[IND24;IND24]-infected mice treated with IND24 ( $n = 5$ ); RML[IND24]-infected mice treated with vehicle ( $n = 7$ ); and RML[IND24;V]-infected mice treated with vehicle ( $n = 6$ ), as indicated. The final treatment in mice is indicated as red (vehicle) or green (IND24). RML[IND24] and RML[V] from Fig. 1D are shown for comparison. Error bars represent standard deviation. n.s., not significant, Student's  $t$  test. (C) Average ratio of monoglycosylated to diglycosylated PrP<sup>Sc</sup> in CAD5 cells infected with RML[IND24;V] ( $n = 6$ ) or RML[IND24;IND24] ( $n = 6$ ). The final treatment in mice is indicated as red (vehicle) or green (IND24). RML[IND24] and RML[V] from Fig. 2E are shown for comparison. Error bars represent standard deviation. \*\*\* $P < 0.001$ ; n.s., not significant, Student's  $t$  test.

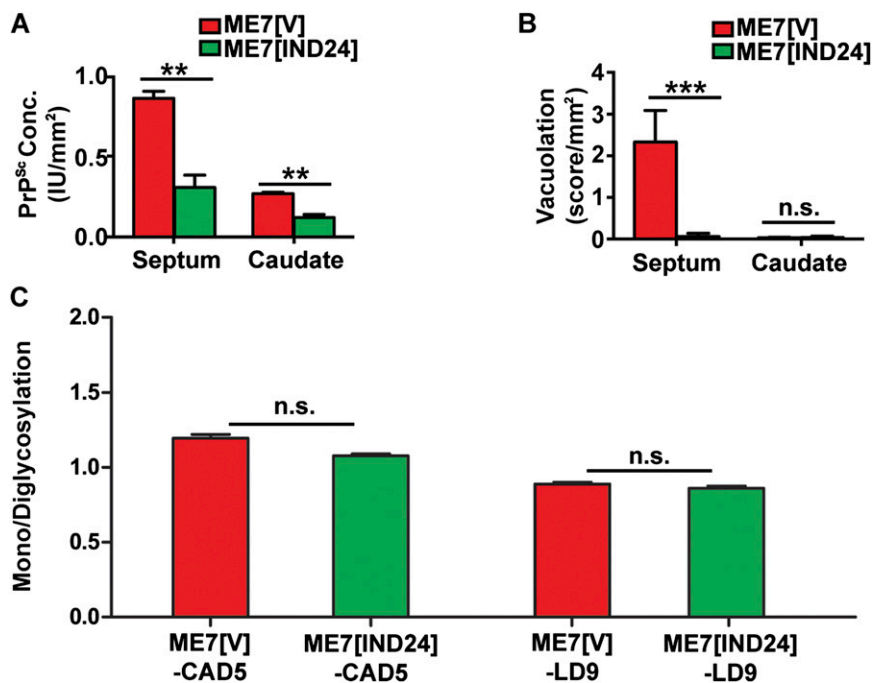

**Fig. S2.** Effects of IND24 treatment on ME7. Quantification of PrP<sup>Sc</sup> deposition (A) and vacuolation (B) in the septum and caudate nucleus from ME7[V] (red; *n* = 5) and ME7[IND24] (green; *n* = 9) animals, as indicated. Error bars represent SEM. PrP<sup>Sc</sup> measurements were made in intensity units (IU). \*\**P* < 0.01, \*\*\**P* < 0.001, n.s. = not significant, Student's *t* test with Bonferroni correction. (C) Average ratio of monoglycosylated to diglycosylated PrP<sup>Sc</sup> in CAD5 and LD9 cells infected with ME7[V] (red; *n* = 3) or ME7[IND24] (green; *n* = 6). Error bars represent SD.

**Table S1. Prion protein glycosylation ratios from passaged prions**

| Strain                     | <i>n</i> | Diglycosylated<br>mean ± SD | Monoglycosylated<br>mean ± SD | Unglycosylated<br>mean ± SD | Mono-/diglycosylated<br>ratio mean ± SD |
|----------------------------|----------|-----------------------------|-------------------------------|-----------------------------|-----------------------------------------|
| RML[V]                     | 7        | 0.31 ± 0.02                 | 0.51 ± 0.02                   | 0.18 ± 0.01                 | 1.64 ± 0.14                             |
| RML[IND24]                 | 7        | 0.36 ± 0.03                 | 0.37 ± 0.01                   | 0.27 ± 0.03                 | 1.03 ± 0.09                             |
| RML[IND81]                 | 9        | 0.43 ± 0.04                 | 0.44 ± 0.03                   | 0.14 ± 0.03                 | 1.03 ± 0.17                             |
| RML[IND24;V]               | 7        | 0.33 ± 0.01                 | 0.43 ± 0.01                   | 0.24 ± 0.02                 | 1.30 ± 0.06                             |
| RML[IND24;IND24]           | 7        | 0.37 ± 0.01                 | 0.36 ± 0.01                   | 0.27 ± 0.01                 | 0.98 ± 0.03                             |
| RML[IND24;V;V]             | 6        | 0.29 ± 0.03                 | 0.47 ± 0.03                   | 0.24 ± 0.03                 | 1.66 ± 0.12                             |
| RML[IND24;IND24;<br>IND24] | 5        | 0.36 ± 0.04                 | 0.36 ± 0.02                   | 0.27 ± 0.06                 | 1.01 ± 0.09                             |

**Table S2. Prion infectability and IND24-resistance in cell culture**

| Inoculum             | Cell line  |                                     |            |                                     |            |                                     |
|----------------------|------------|-------------------------------------|------------|-------------------------------------|------------|-------------------------------------|
|                      | N2a        |                                     | CAD5       |                                     | LD9        |                                     |
|                      | Infection* | Resistance<br>to IND24 <sup>†</sup> | Infection* | Resistance<br>to IND24 <sup>†</sup> | Infection* | Resistance<br>to IND24 <sup>†</sup> |
| RML                  | 3/3        | +                                   | 2/2        | +                                   | —          | —                                   |
| RML[V]               | 2/3        | +                                   | 6/6        | +                                   | —          | —                                   |
| RML[IND24]           | 1/8        | +                                   | 6/6        | ++++                                | —          | —                                   |
| RML[IND24;V]         | 6/6        | +                                   | 6/6        | +                                   | —          | —                                   |
| RML[IND24;<br>IND24] | 0/6        | n/a                                 | 6/6        | ++++                                | —          | —                                   |
| ME7                  | —          | —                                   | 5/5        | +++                                 | 5/5        | +++                                 |
| ME7[V]               | —          | —                                   | 3/3        | +++                                 | 3/3        | +++                                 |
| ME7[IND24]           | —          | —                                   | 6/6        | +++                                 | 6/6        | +++                                 |

n/a, not applicable; —, not attempted.

\*Number of successful infections over the number of attempts.

<sup>†</sup>Qualitative measure of resistance, from low (+) to high (++++).
